# Supplementary material for: The Genetic Profile of Large B-Cell Lymphomas Presenting in the Ocular Adnexa
Source: MDPI journal article supplement (doi:10.3390/ijms25063094), 2024-03-07
Supplement: s1 [file s1]

## Supplementary Table S1

**Table S1:** Comparison of clinical characteristics between molecular groups in the survival cohort (n=22) excluding relapsed DLBCL-NOS cases

|                                | MYD88<br>Mutation | MYD88<br>WT | <i>P</i> | LymphGen<br>MCD | LymphGen<br>Non-MCD <sup>3</sup> | <i>P</i> | Non-GCB    | GCB        | <i>P</i> | Double-<br>expressor | Non double-<br>expressor | <i>P</i> |
|--------------------------------|-------------------|-------------|----------|-----------------|----------------------------------|----------|------------|------------|----------|----------------------|--------------------------|----------|
| <b>Number</b>                  | 6                 | 16          |          | 6               | 8                                |          | 9          | 13         |          | 11                   | 11                       |          |
| <b>Age<sup>1</sup> (years)</b> | 76 (73-91)        | 74 (70-80)  | 0.40     | 76 (73-82)      | 78 (70-83)                       | 0.95     | 74 (73-83) | 75 (67-79) | 0.57     | 76 (73-89)           | 72 (65-79)               | 0.14     |
| <b>Sex</b>                     |                   |             | 1        |                 |                                  | 0.28     |            |            | 0.42     |                      |                          | 0.67     |
| Male                           | 3 (50.0)          | 7 (44)      |          | 4 (67)          | 2 (25)                           |          | 3 (33)     | 7 (54)     |          | 6 (55)               | 4 (36)                   |          |
| Female                         | 3 (50.0)          | 9 (56)      |          | 2 (33)          | 6 (75)                           |          | 6 (67)     | 6 (46)     |          | 5 (45)               | 7 (64)                   |          |
| <b>Ann Arbor stage</b>         |                   |             | 0.57     |                 |                                  | 1        |            |            | 0.49     |                      |                          | 0.045    |
| IE-IIIE                        | 4 (67)            | 12 (75)     |          | 5 (83)          | 7 (87.5)                         |          | 8 (89)     | 8 (62)     |          | 7 (64)               | 9 (82)                   |          |
| IV                             | 0 (0)             | 2 (12.5)    |          | 0 (0)           | 0 (0)                            |          | 0 (0)      | 2 (15)     |          | 0 (0)                | 2 (18)                   |          |
| Unstaged                       | 2 (33)            | 2 (12.5)    |          | 1 (17)          | 1 (12.5)                         |          | 1 (11)     | 3 (23)     |          | 4 (36)               | 0 (0)                    |          |
| <b>Treatment<sup>2</sup></b>   |                   |             | 1        |                 |                                  | 1        |            |            | 1        |                      |                          | 0.009    |
| Rituximab + chemotherapy ± RT  | 3 (50)            | 8 (50)      |          | 3 (50)          | 5 (63)                           |          | 5 (56)     | 6 (46)     |          | 2 (18)               | 9 (82)                   |          |
| Other/no treatment             | 3 (50)            | 8 (50)      |          | 3 (50)          | 3 (37)                           |          | 4 (44)     | 7 (54)     |          | 9 (82)               | 2 (18)                   |          |
| RT ± prednisolone              | 2 (33)            | 5 (31)      |          | 3 (50)          | 1 (12.5)                         |          | 4 (44)     | 3 (23)     |          | 6 (55)               | 1 (9)                    |          |
| Chemotherapy ± RT              | 0 (0.0)           | 1 (6)       |          | 0 (0)           | 1 (12.5)                         |          | 0 (0)      | 1 (8)      |          | 1 (9)                | 0 (0)                    |          |
| No treatment                   | 1 (17)            | 2 (13)      |          | 0 (0)           | 1 (12.5)                         |          | 0 (0)      | 3 (23)     |          | 2 (18)               | 1 (9)                    |          |

1: Displayed as median and interquartile range

2: Statistical significance is tested between the Rituximab-based chemotherapy group and the other/no treatment group, which compiles the following treatment groups: RT ± prednisolone, Chemotherapy ± RT, No treatment

3: The LymphGen non-MCD group includes all other LymphGen subtypes (only classified cases)

**Abbreviations:** RT: radiotherapy; GCB: germinal center B-cell

## Supplementary Table S2

| Table S2: Genes included in BLYMFv2 panel |          |          |           |           |           |                 |          |
|-------------------------------------------|----------|----------|-----------|-----------|-----------|-----------------|----------|
| ACTB                                      | ACTG1    | ARID1A   | ARID1B    | ATM       | B2M       | BCL10           | BCL2     |
| BCL6                                      | BCL7A    | BCOR     | BIRC3     | BRAF      | BTG1      | BTG2            | BTB      |
| CARD11                                    | CCND1    | CCND3    | CD37      | CD58      | CD70      | CD79A           | CD79B    |
| CD83                                      | CDKN2A   | CDKN2B   | CIITA     | CREBBP    | CTNNA1    | CXCR4           | CXCR5    |
| DTX1                                      | DUSP2    | EBF1     | EEF1A1    | EGFR      | EP300     | ETS1            | ETV6     |
| EZH2                                      | FAS      | FBXW7    | FOXO1     | GNAI3     | GNAI2     | GRHR            | HIST1H1B |
| HIST1H1C                                  | HIST1H1D | HIST1H1E | HIST1H2AC | HIST1H2AM | HIST1H2BC | HIST1H2BK       | ID3      |
| IDH1                                      | IGLL5    | IKBKB    | IRF2BP2   | IRF4      | IRF8      | IRS2            | ITPKB    |
| JAK3                                      | KLF2     | KLHL14   | KLHL6     | KMT2D     | KRAS      | LRP1B           | LYN      |
| MALT1                                     | MAP2K1   | MCL1     | MEF2B     | MPEG1     | MSH3      | MTOR            | MYC      |
| MYD88                                     | NFKBIA   | NFKBIE   | NFKBIZ    | NOTCH1    | NOTCH2    | NSD2<br>(WHSC1) | NTRK1    |
| OSBPL10                                   | PAX5     | PIK3CA   | PIM1      | PIM2      | PLCG2     | POU2F2          | PRDM1    |
| PTEN                                      | PTPN11   | PTPN6    | PTPRD     | RRAGC     | S1PR2     | SETD1B          | SF3B1    |
| SGK1                                      | SLC22A16 | SLCO1A2  | SOC3      | SPIB      | STAT3     | STAT6           | TBL1XR1  |
| TCF3                                      | TCL1A    | TET2     | TMEM30A   | TMSB4X    | TNFAIP3   | TNFRSF14        | TOX      |
| TP53                                      | TRAF2    | TRAF3    | UBE2A     | UBR5      | XBP1      | ZEB2            | ZFAT     |
