# Supplementary material for: The Genetic Profile of Large B-Cell Lymphomas Presenting in the Ocular Adnexa
Source: MDPI journal article supplement (doi:10.3390/ijms25063094), 2024-03-07
Supplement: s1 [file s1]

Supplementary Figure S2

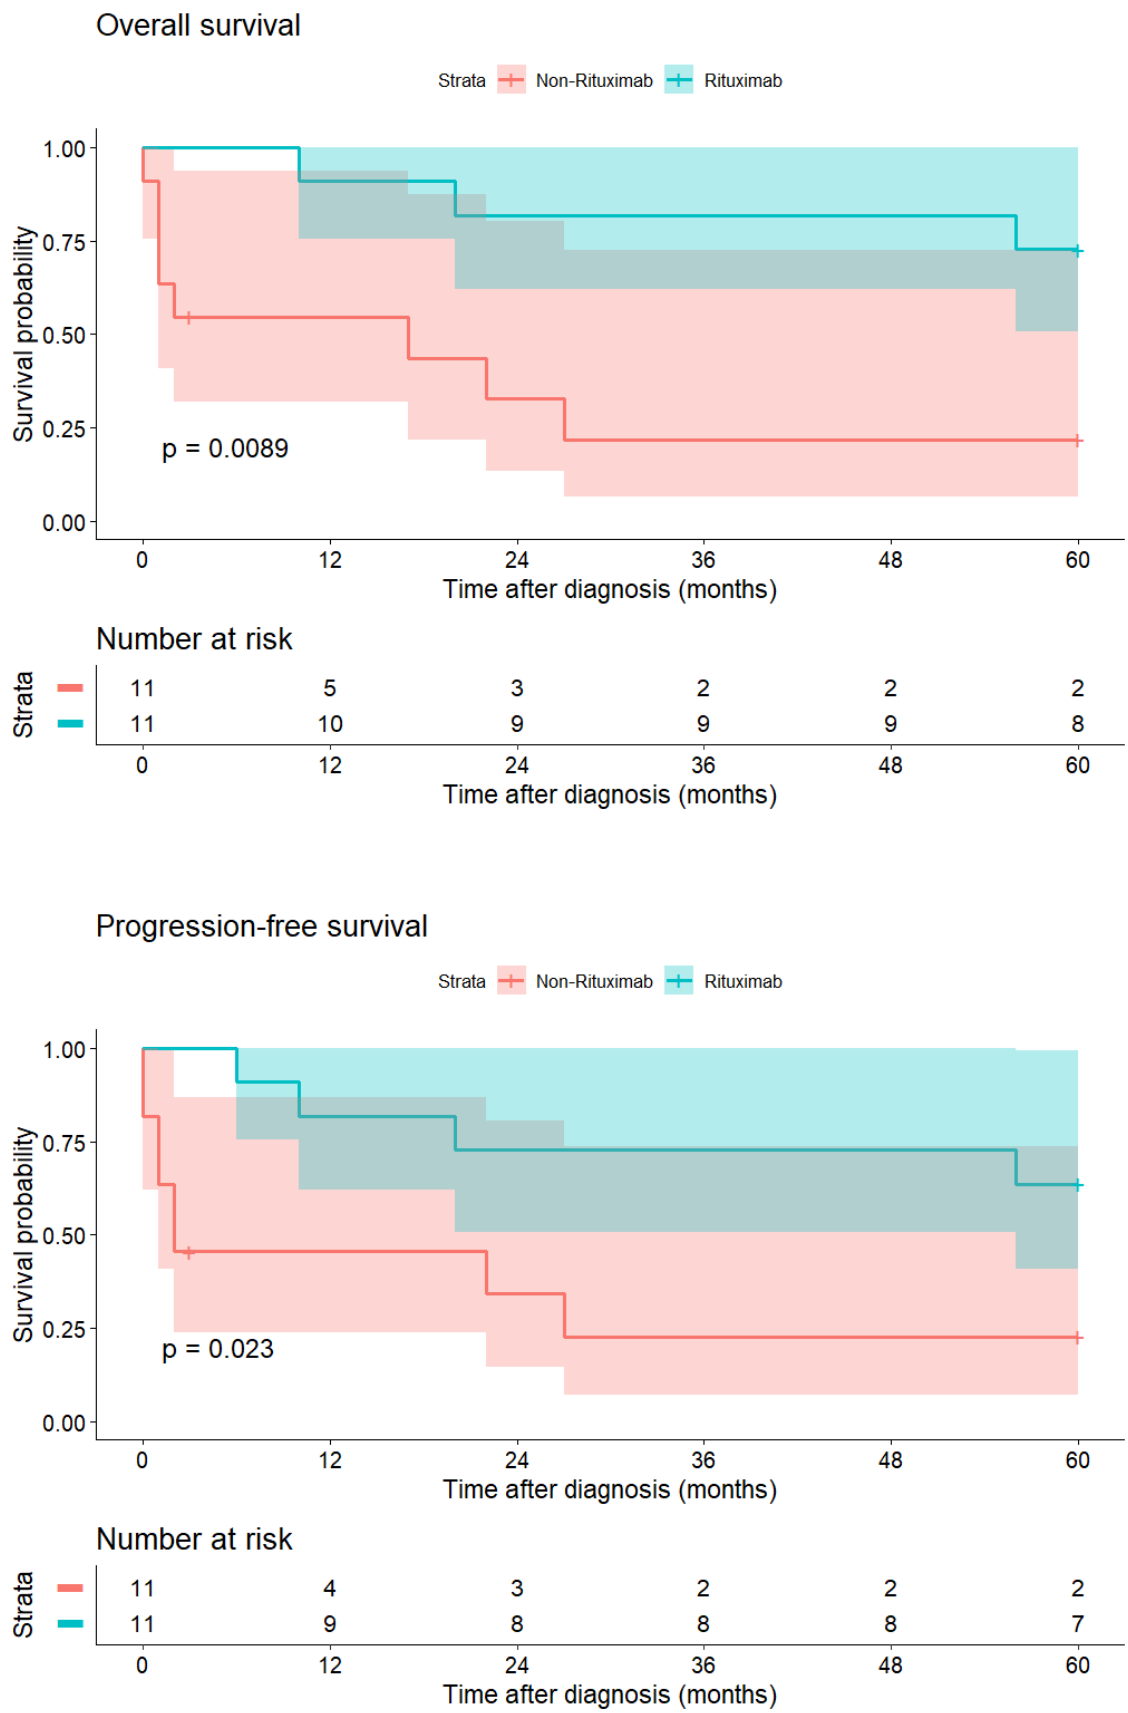

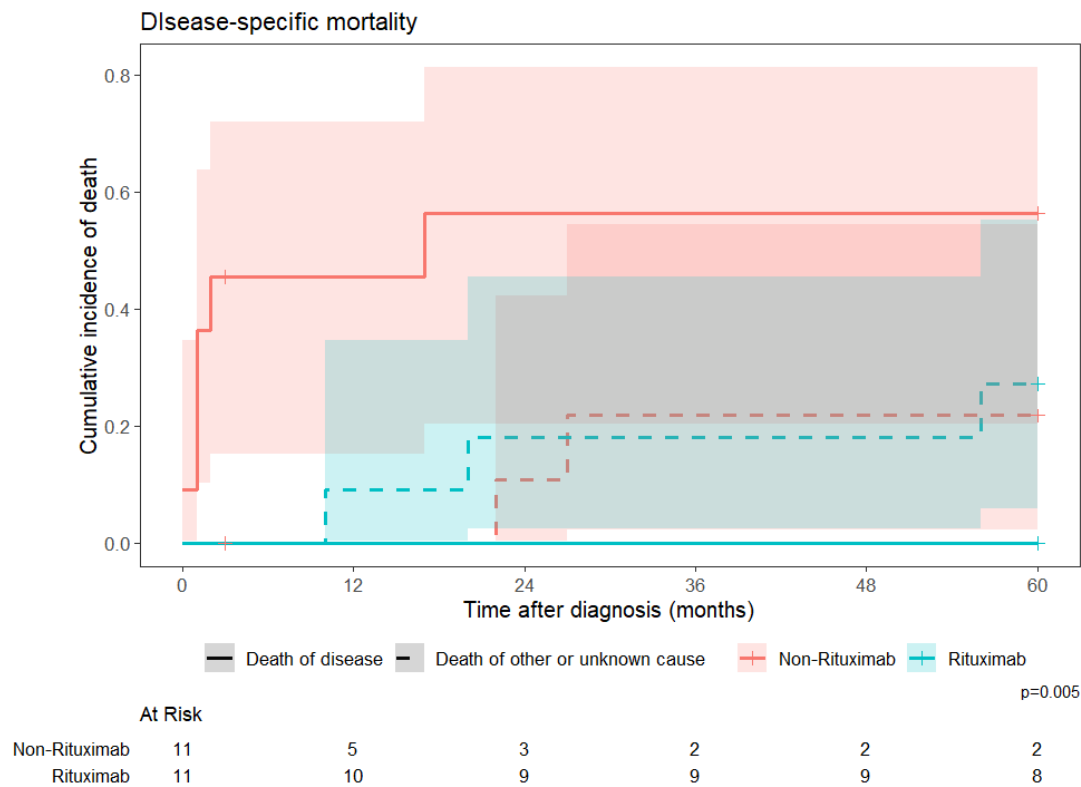

**Supplementary Figure S2:** Survival of patients receiving Rituximab-based chemotherapy (n=11) as compared to patients receiving other (n=8) (radiotherapy and/or chemotherapy) or no treatment (n=3) (non-Rituximab group). Overall survival, progression-free survival, and disease-specific mortality was significantly better in patients receiving Rituximab-based chemotherapy as compared to other or no treatment. None of the patients receiving Rituximab-based chemotherapy died from lymphoma-related deaths within follow-up. 95% confidence intervals are included. Patients with relapsed DLBCL-NOS were excluded from the survival analyses.
