# Supplementary material for: The Genetic Profile of Large B-Cell Lymphomas Presenting in the Ocular Adnexa
Source: Int J Mol Sci. 2024 Mar 7;25(6):3094. doi: 10.3390/ijms25063094 (PMC10970350; doi:10.3390/ijms25063094)
Supplement: Supplementary file 1 [file ijms-25-03094-s001.zip]

Archive with 5 entries (5 files):
- Supplementary Figure S1 including figure caption.pdf
- Supplementary Figure S2 including figure caption.pdf
- Supplementary methods.pdf
- Supplementary STROBE Statement checklist.pdf
- Supplementary tables.pdf
